# Supplementary material for: Increasing unsaturated Se number and facilitating atomic hydrogen adsorption of WSe2+x nanodots for improving photocatalytic H2 production of TiO2
Source: Royal Society of Chemistry journal article supplement (doi:10.1039/d2ta00686c), 2022-01-01
Supplement: d2ta00686c1.pdf [file d2ta00686c1.pdf]

## Supporting Information

### **Increasing unsaturated Se number and facilitating atomic hydrogen adsorption of WSe<sub>2+x</sub> nanodot for improving photocatalytic H<sub>2</sub> production of TiO<sub>2</sub>**

Duoduo Gao,<sup>a</sup> Wei Zhong,<sup>a</sup> Xuefei Wang,<sup>a</sup> Feng Chen<sup>a</sup> and Huogen Yu<sup>\*a,b</sup>

<sup>a</sup> State Key Laboratory of Silicate Materials for Architectures and School of Chemistry, Chemical Engineering and Life Sciences, Wuhan University of Technology, Wuhan 430070, P.R. China

<sup>b</sup> Laboratory of Solar Fuel, Faculty of Materials Science and Chemistry, China University of Geosciences, Wuhan, 430074, P.R. China

Tel: 0086-27-65277083, Fax: 0086-27-87879468

E-mail: huogenyu@163.com (H.Yu)

**Number of pages: 21**

**Number of Tables: 3**

**Number of Figures: 10**

## Supporting Information Content

|                         |     |
|-------------------------|-----|
| <b>Experiment</b> ..... | S3  |
| <b>Table S1</b> .....   | S8  |
| <b>Table S2</b> .....   | S9  |
| <b>Table S3</b> .....   | S10 |
| <b>Fig. S1</b> .....    | S11 |
| <b>Fig. S2</b> .....    | S12 |
| <b>Fig. S3</b> .....    | S13 |
| <b>Fig. S4</b> .....    | S14 |
| <b>Fig. S5</b> .....    | S15 |
| <b>Fig. S6</b> .....    | S16 |
| <b>Fig. S7</b> .....    | S17 |
| <b>Fig. S8</b> .....    | S18 |
| <b>Fig. S9</b> .....    | S19 |
| <b>Fig. S10</b> .....   | S20 |
| <b>References</b> ..... | S21 |

## **EXPERIMENTAL SECTION**

### **SI-1 Preparation of g-C<sub>3</sub>N<sub>4</sub> and CdS photocatalysts**

The g-C<sub>3</sub>N<sub>4</sub> photocatalyst was obtained by a simple calcination-hydrothermal procedure via using melamine powder as the precursor. According to previous studies, the melamine precursor was calcined at 550 °C for 4 h in ambient atmosphere to obtain the bulk g-C<sub>3</sub>N<sub>4</sub>. To increase its specific surface area, the as-prepared g-C<sub>3</sub>N<sub>4</sub> sample was further treated by a hydrothermal method. In briefly, 0.5 g of the calcined g-C<sub>3</sub>N<sub>4</sub> powder was dispersed into 70 mL of deionized water, then stirred at room temperature for 1 h, and finally maintained at 180 °C for 12 h. After cooling down to room temperature, the resulting sample was washed for several times, and then dried at 60 °C for overnight to obtain the g-C<sub>3</sub>N<sub>4</sub> photocatalyst.

The CdS photocatalyst was synthesized by a frequently-used precipitation method. In brief, 140 mL of 0.1 mol L<sup>-1</sup> Na<sub>2</sub>S solution was added into 140 mL of 0.1 mol L<sup>-1</sup> Cd(NO<sub>3</sub>)<sub>2</sub> solution. The resulting suspension was vigorously stirred at room temperature for 2 h and then it was allowed to stay for overnight. The orange-red precipitate was collected by filtration, rinsed with plenty of deionized water, and dried at 60 °C for 24 h to obtain the CdS photocatalyst.

### **SI-2 Synthesis of Se-enriched WSe<sub>2+x</sub>/g-C<sub>3</sub>N<sub>4</sub> and WSe<sub>2+x</sub>/CdS photocatalysts**

The Se-enriched WSe<sub>2+x</sub>-modified CdS and g-C<sub>3</sub>N<sub>4</sub> photocatalysts can be obtained by a similar procedure as the WSe<sub>2+x</sub>/TiO<sub>2</sub> via employing CdS and g-C<sub>3</sub>N<sub>4</sub> as

the raw materials, respectively (the preparation process of CdS and g-C<sub>3</sub>N<sub>4</sub> photocatalysts are shown in SI-1). In this case, the mass ratio of W to CdS (or g-C<sub>3</sub>N<sub>4</sub>) is regulated to be 3 wt% (W: Se = 1:8). After the suspension is bubbled with nitrogen for 0.5 h, the above system is irradiated via four illuminator (420 nm) to induce the simultaneous photodeposition of Se-rich WSe<sub>2+x</sub> and its H<sub>2</sub>-evolution. The hydrogen-generation rate is evaluated by the gas chromatograph (GC-2014C, Shimadzu, TCD). After that, the precipitations are washed and dried in vacuum oven (50 °C, 12 h). In this case, the attained samples are referred as WSe<sub>2+x</sub>/CdS or WSe<sub>2+x</sub>/g-C<sub>3</sub>N<sub>4</sub>, respectively.

### SI-3 Synthesis of a-MSe<sub>2+x</sub>/TiO<sub>2</sub> (M = Cu, Fe, Co, Ni or Mo) photocatalysts

The Se-enriched a-MSe<sub>2+x</sub>-modified TiO<sub>2</sub> (M = Cu, Fe, Co, Ni or Mo) photocatalysts were also prepared under identical procedure as the WSe<sub>2+x</sub>/TiO<sub>2</sub>(3wt%). Herein, the WCl<sub>5</sub> was replaced by CuCl<sub>2</sub>, FeCl<sub>3</sub>, CoCl<sub>3</sub>, NiCl<sub>2</sub> and MoCl<sub>5</sub>, respectively.

### SI-4 The AQE calculation

The apparent quantum efficiency (AQE) of WSe<sub>2+x</sub>/TiO<sub>2</sub>(3wt%) photocatalyst is calculated via the following equation:

$$\begin{aligned} \text{AQE}(\%) &= \frac{\text{number of reacted electrons}}{\text{number of incident photons}} \times 100\% \\ &= \frac{\text{number of evolved H}_2 \text{ molecules} \times 2}{\text{number of incident photons}} \times 100\% \end{aligned}$$

The average power of the UV light (four 3-W 365 nm) was 19 mW/cm<sup>2</sup>, which was

detected by an irradiometer (UV-B, Beijing Normal University Optical Instrument).

Hence, the AQE can be calculated to be 18.1%.

### SI-5 The TON calculation

Turnover number (TON) of  $\text{WSe}_{2+x}$  nanoclusters for the  $\text{WSe}_{2+x}/\text{TiO}_2(3\text{wt}\%)$  photocatalyst is calculated via the following equation:

$$\text{TON} = \frac{2 \times \text{the moles of evolved H}_2}{\text{the moles of cocatalyst on photocatalyst}}$$

According to the inductively coupled plasma-optical emission spectrometry, it is found that the  $\text{WSe}_{2+x}$  amount in the  $\text{WSe}_{2+x}/\text{TiO}_2(3\text{wt}\%)$  is 11.61 wt% (2.67 wt% for W, and 8.94 wt% for Se). Therefore, for 50 mg of the  $\text{WSe}_{2+x}/\text{TiO}_2(3\text{wt}\%)$  photocatalyst used in photocatalytic  $\text{H}_2$ -evolution reaction, the true  $\text{WSe}_{2+x}$  amount can be calculated to be 5.80 mg, corresponding to 7.25  $\mu\text{mol}$ . In addition, the total amount of  $\text{H}_2$  generation of  $\text{WSe}_{2+x}/\text{TiO}_2(3\text{wt}\%)$  was 2262.48  $\mu\text{mol}$  for 12 h. Therefore, the TON can be calculated as following:  $2262.48 \mu\text{mol} \times 2 / 7.25 \mu\text{mol} = 624.13$ .

## SI-6 DFT calculations

The density functional theory (DFT) calculations were carried out by using the Vienna Ab initio Simulation Package (VASP). The exchange–correlation interaction was described by generalized gradient approximation (GGA) with the Perdew–Burke–Ernzerhof (PBE) functional. The energy cutoff and Monkhorst–Pack k-point mesh were set as 450 eV and  $3 \times 3 \times 1$ , respectively. The convergence threshold was set as  $10^{-5}$  eV for energy and  $0.01 \text{ eV} \cdot \text{\AA}^{-1}$  for force. For the construction of surface models, a vacuum of 20 Å was used to ensure that no appreciable interaction occurred between periodic structures. The Gibbs free energy of H atom adsorption ( $\Delta G_{\text{H}^*}$ ) was defined as  $\Delta G_{\text{H}^*} = \Delta E_{\text{H}^*} + \Delta E_{\text{ZPE}} - T\Delta S_{\text{H}}$ . The entropy of H<sub>2</sub> gas at 298 K is  $130 \text{ J} \cdot \text{mol}^{-1} \cdot \text{K}^{-1}$ . Therefore,  $T\Delta S_{\text{H}}$  was calculated to be  $-0.20 \text{ eV}$ . During the geometry optimization, the bottom half of W and Se atoms were fixed, while other atoms were relaxed. W-vacancy WSe<sub>2</sub> model was constructed by removing a surface W atom in the WSe<sub>2</sub> (001) model. Se-attached WSe<sub>2</sub> model was created via adsorbing a surface Se atom in the WSe<sub>2</sub> (001) model.

## SI-7 Photoelectrochemical measurements

The photoelectrochemical properties were conducted on a CHI660E electrochemical workstation (Chenhua Instrument, Shanghai, China) in a standard three-electrode system by using Na<sub>2</sub>SO<sub>4</sub> (0.5 M) as the electrolyte solution, where the photocatalyst-coated FTO (fluorine-doped tin oxide substrate), Ag/AgCl and platinum wire act as the working electrode, reference electrode and counter electrode,

respectively. High-purity N<sub>2</sub> was purged into the three-electrode cell for 15 min to remove O<sub>2</sub> before all the testing. The light source was provided by one 3-W LED irradiator (365-nm, Shenzhen Lamplac Science Co. Ltd.).

The working electrodes were prepared on FTO substrate with an active area of about 1.0 cm<sup>2</sup>, where the side of FTO glass is protected by Scotch tape. First, FTO glass was washed with deionized water and ethanol for three times, respectively, and then was dried at 40 °C for 12 h. Second, 10 mg of photocatalyst was dispersed into a Nafion-ethanol solution with 1 mL D-520 Nafion (5%, w/w, in water and 1-propanol, Alfa Aesar) and 1 mL anhydrous ethanol, and subsequently ultrasonicated for 30 min to obtain a suspension solution. Finally, the above suspension was coated on the FTO surface to form a uniform film (with a thickness of 5-10 μm) and then dried at 40 °C for 12 h.

The linear sweep voltammetry (LSV) curves were measured at the potential ranging from -0.8 to -1.4 (vs Ag/AgCl) with a scan rate of 10 mV s<sup>-1</sup>. The transient photocurrent responses with time (*i-t* curve) can be achieved at a bias potential of +0.5 V during repeated ON/OFF illumination cycles. The electrochemical impedance spectroscopy (EIS) was carried out in the frequency range of 0.001 Hz-10<sup>6</sup> Hz with an ac amplitude of 10 mV at the open circuit voltage.

**Table S1** The ICP-OES results (atom %) for different photocatalysts

| Samples                                                 | Se (at. %) | W (at. %) | Se/W |
|---------------------------------------------------------|------------|-----------|------|
| TiO <sub>2</sub>                                        | 0          | 0         | 0    |
| Se-enriched WSe <sub>2+x</sub> /TiO <sub>2</sub> (3wt%) | 8.94       | 2.67      | 3.35 |
| Amorphous WSe <sub>2</sub> /TiO <sub>2</sub> (3wt%)     | 5.32       | 2.46      | 2.16 |
| Crystalline WSe <sub>2</sub> /TiO <sub>2</sub> (3wt%)   | 4.83       | 2.54      | 1.90 |



**Table S2** Comparisons of photocatalytic H<sub>2</sub>-evolution activity for low-costcocatalyst-modified TiO<sub>2</sub>

| Photocatalyst    | Cocatalysts          | Sacrificial agent     | Light source                               | Activity (μmol/h/g)/AQE | Ref.             |
|------------------|----------------------|-----------------------|--------------------------------------------|-------------------------|------------------|
| TiO <sub>2</sub> | WSe <sub>2+x</sub>   | ethanol-water         | 3 W LED<br>365 nm                          | 3770.80/18.10%          | <b>This work</b> |
| TiO <sub>2</sub> | MoS <sub>2</sub>     | methanol-water        | 3.5 W LED<br>365 nm                        | 2443/8.30%              | 1                |
| TiO <sub>2</sub> | NiCoP                | methanol-water        | 300 W Xe<br>lamp                           | 1540                    | 2                |
| TiO <sub>2</sub> | MoC                  | methanol-water        | 3 W LED<br>365 nm                          | 504/1.4%                | 3                |
| TiO <sub>2</sub> | Fe-Ni                | ethanol-water         | 500 W Xe<br>lamp λ > 400<br>nm             | 361                     | 4                |
| TiO <sub>2</sub> | CoS <sub>x</sub>     | triethanolamine-water | 3 W LED<br>365 nm                          | 2394                    | 5                |
| TiO <sub>2</sub> | a-CoMoS <sub>x</sub> | ethanol-water         | 500-W high-<br>pressure<br>mercury<br>lamp | 2160                    | 6                |
| TiO <sub>2</sub> | Cu <sub>x</sub> P    | methanol-water        | UV-PC Hg<br>lamp                           | 1870/7.70%              | 7                |
| TiO <sub>2</sub> | Cu(OH) <sub>2</sub>  | methanol-water        | 500 W Xe<br>lamp                           | 1994                    | 8                |
| TiO <sub>2</sub> | NiS                  | methanol              | 350 W Xe<br>lamp                           | 655                     | 9                |
| TiO <sub>2</sub> | Ni                   | triethanolamine-water | UV-visible                                 | 1160                    | 10               |

**Table S3** Fluorescence emission lifetime and relevant percentage data fitted by a three-exponential function.

| Samples                                             | $\tau_1$<br>(ns) | $A_1$<br>(%) | $\tau_2$<br>(ns) | $A_2$<br>(%) | $\tau_3$<br>(ns) | $A_3$<br>(%) | Average<br>lifetime ( $\tau_a$ ) (ns) | $\chi^2$ |
|-----------------------------------------------------|------------------|--------------|------------------|--------------|------------------|--------------|---------------------------------------|----------|
| TiO <sub>2</sub>                                    | 0.45             | 54.11        | 2.24             | 42.13        | 19.60            | 3.79         | 8.69                                  | 1.08     |
| Se-enriched<br>WSe <sub>2+x</sub> /TiO <sub>2</sub> | 0.40             | 74.14        | 3.43             | 46.85        | 20.53            | 15.30        | 13.89                                 | 1.17     |
| Amorphous<br>WSe <sub>2</sub> /TiO <sub>2</sub>     | 0.35             | 68.91        | 2.97             | 23.27        | 13.76            | 13.95        | 10.00                                 | 1.15     |
| Crystalline<br>WSe <sub>2</sub> /TiO <sub>2</sub>   | 0.37             | 63.98        | 3.26             | 28.00        | 15.47            | 8.02         | 9.31                                  | 1.07     |

The above fitted parameters are acquired via the following tri-exponential formulas:

$$I_{(t)} = I_0 + A_1 \exp(-t/\tau_1) + A_2 \exp(-t/\tau_2) + A_3 \exp(-t/\tau_3) \quad (1)$$

$$\tau_a = (A_1 \tau_1^2 + A_2 \tau_2^2 + A_3 \tau_3^2) / (A_1 \tau_1 + A_2 \tau_2 + A_3 \tau_3) \quad (2)$$

where  $I_0$  is the baseline correction value,  $A_1$ ,  $A_2$  and  $A_3$  represent the tri-exponential factors, and  $\tau_1$ ,  $\tau_2$ ,  $\tau_3$  and  $\tau_a$  corresponding the lifetime in various stages (radiation, non-radiation and energy transfer) and average lifetime,  $\chi^2$  is the goodness-of-fit.

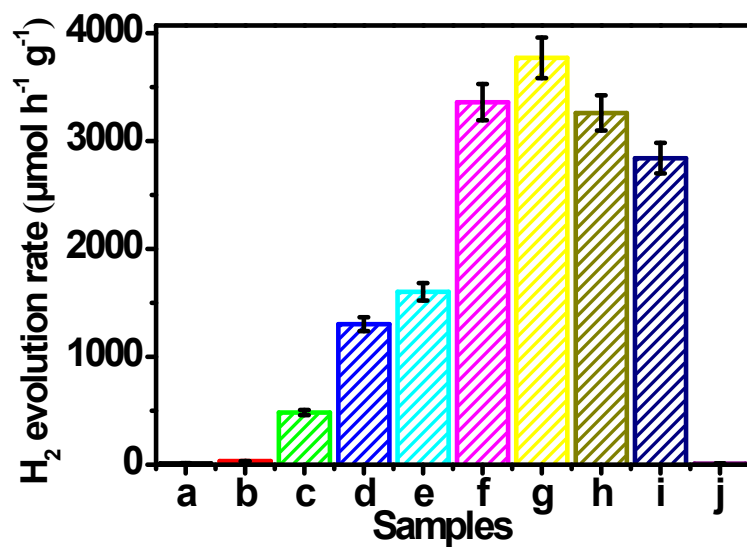

**Fig. S1** The effect of Se/W ratios on the H<sub>2</sub>-evolution activity of Se-enriched WSe<sub>2+x</sub>/TiO<sub>2</sub>(3wt%): (a) 0:0; (b) 0:1, (c) 0.2:1, (d) 1:1, (e) 2:1, (f) 4:1, (g) 8:1, (h) 10:1, (i) 12:1, and (j) 8:0.

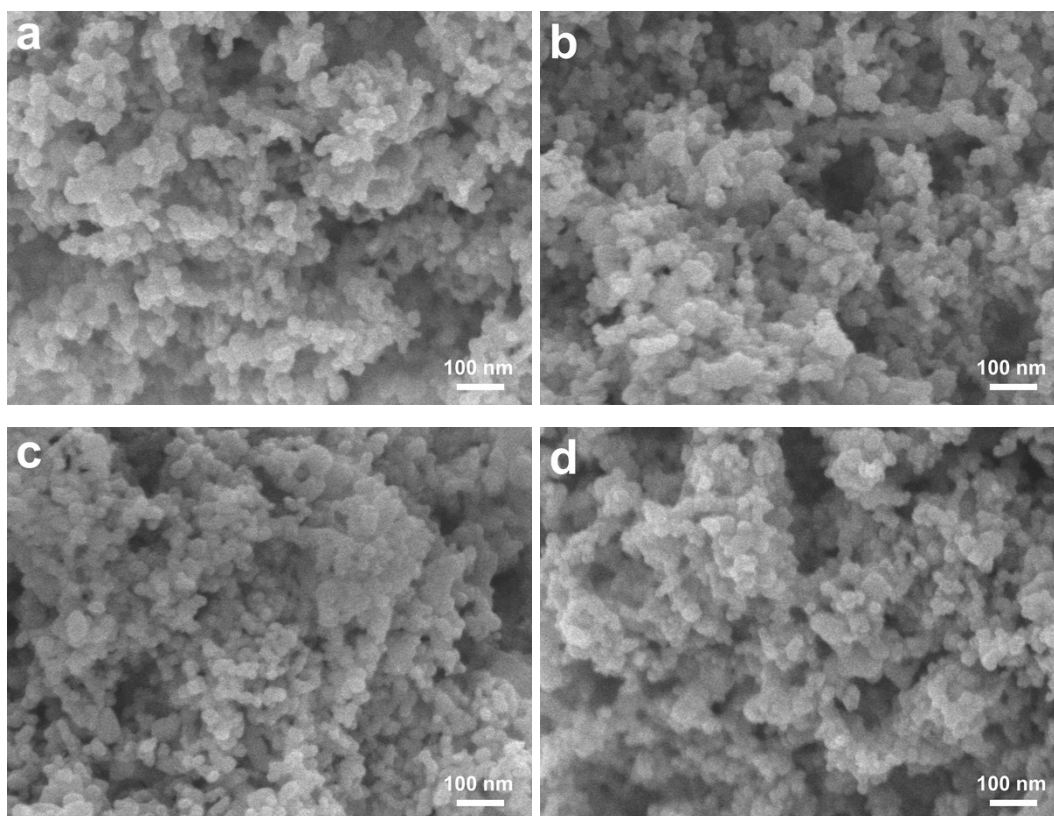

**Fig. S2** FESEM images of (a)  $\text{TiO}_2$ , (b) Se-enriched  $\text{WSe}_{2+x}/\text{TiO}_2(3\text{wt}\%)$ , (c) amorphous  $\text{WSe}_2/\text{TiO}_2(3\text{wt}\%)$ , and (d) crystalline  $\text{WSe}_2/\text{TiO}_2(3\text{wt}\%)$ .

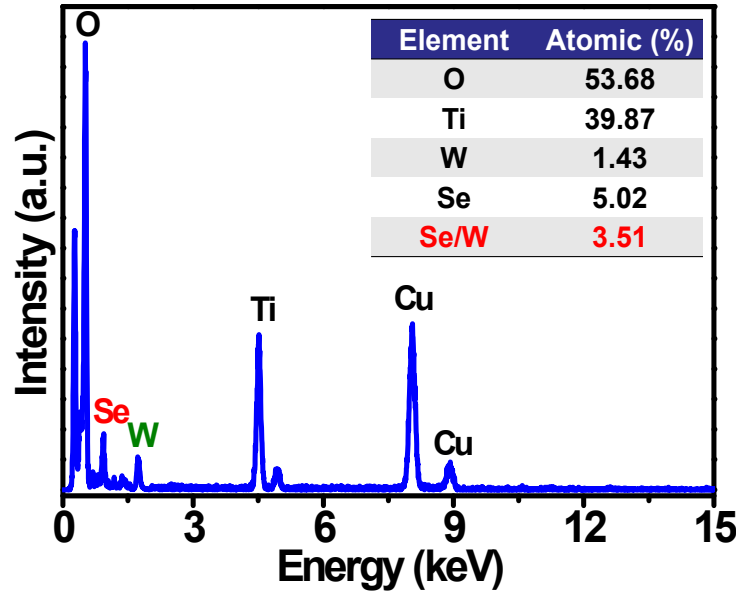

Fig. S3 EDX spectrum of Se-enriched  $WSe_{2+x}/TiO_2(3wt\%)$ .

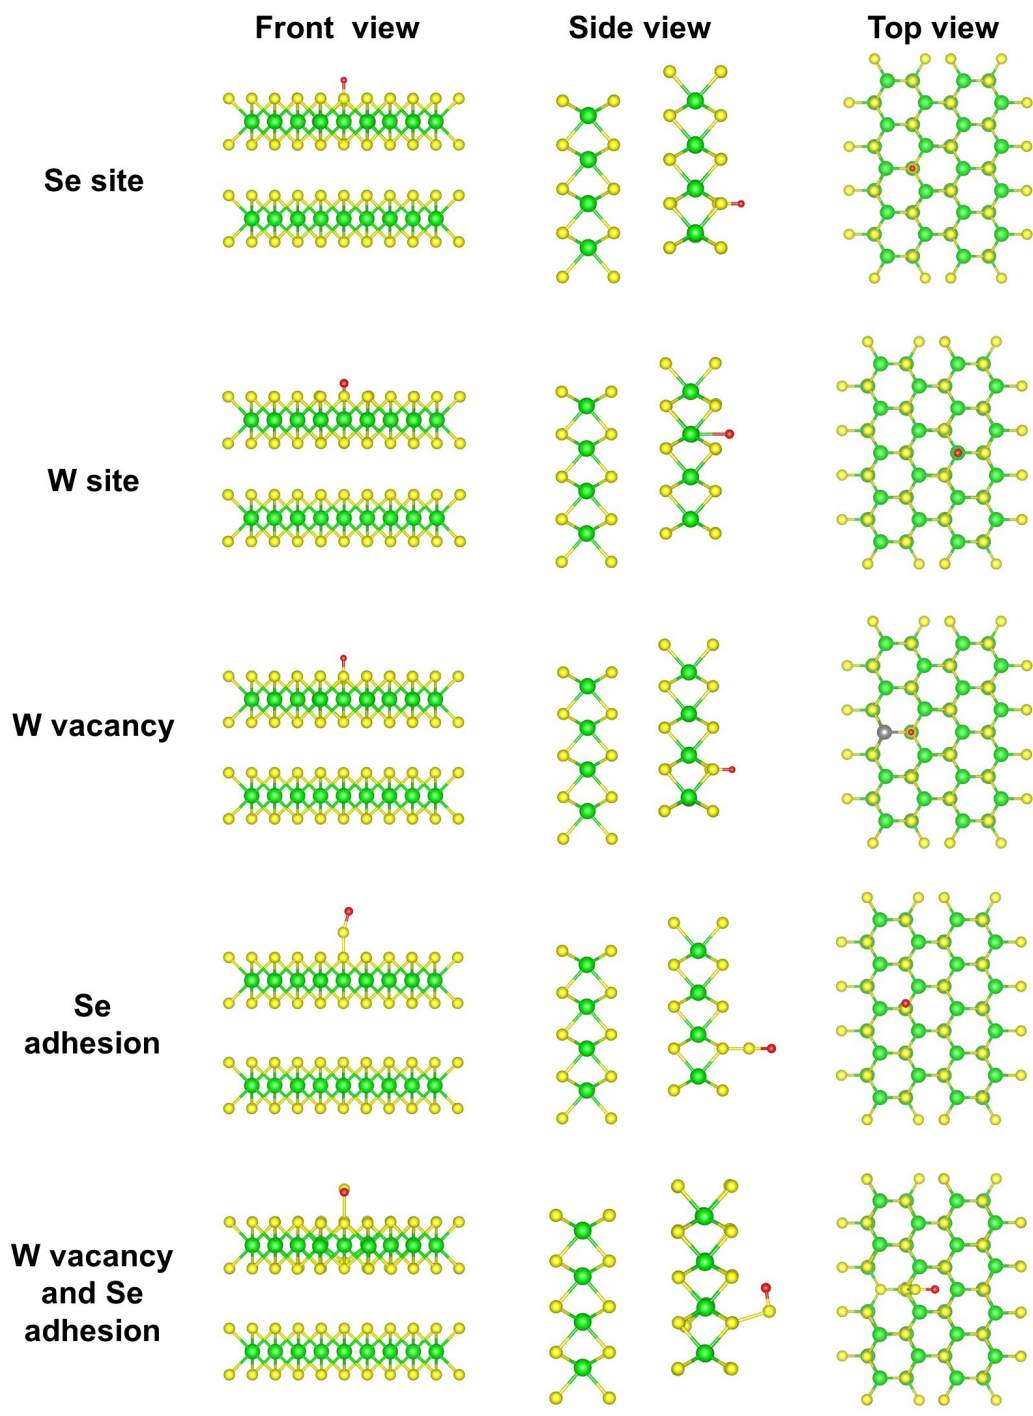

**Fig. S4** Structure models from DFT calculations for various WSe<sub>2</sub> with different H-adsorbed states (Front, side and top views).

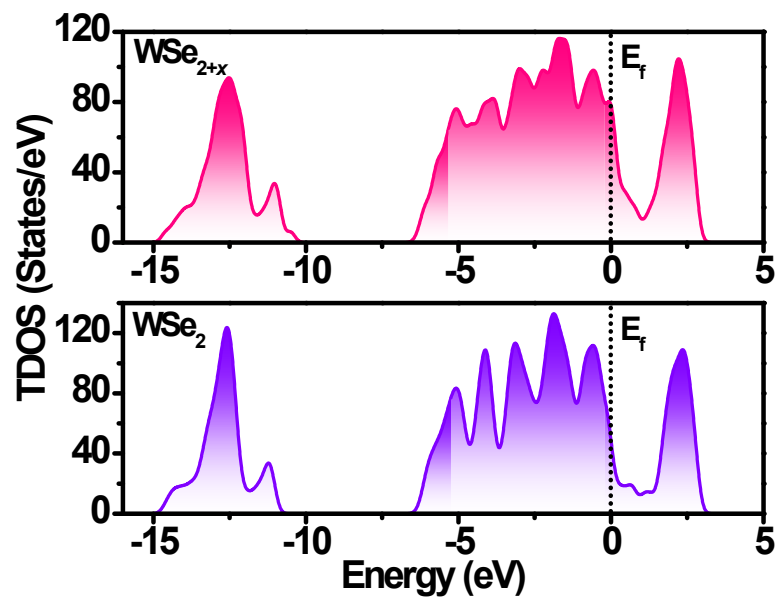

**Fig. S5** The total density of states (TDOS) of  $WSe_2$  and  $WSe_{2+x}$  with W-vacancy and Se-adhesion.

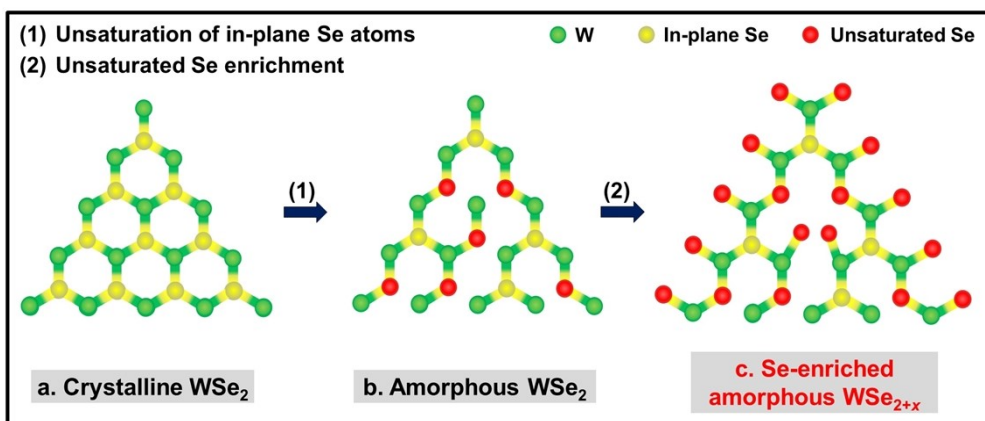

**Fig. S6** Schematic illustration of the unsaturated selenium-enriched regulation to increase the active-site number of  $WSe_{2+x}$  cocatalyst by (1) unsaturation of in-plane Se atoms and (2) unsaturated Se enrichment.



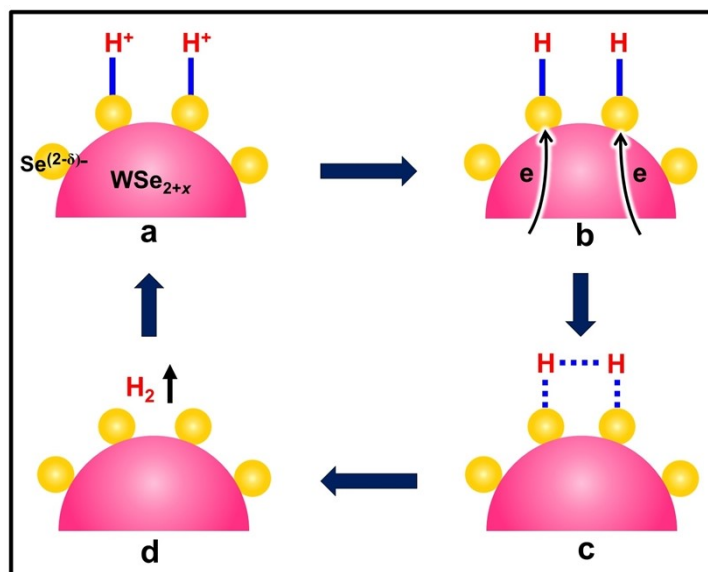

**Fig. S7** The detailed interfacial H<sub>2</sub>-evolution process on the active Se<sup>(2-δ)</sup> sites of WSe<sub>2+x</sub>/TiO<sub>2</sub>: a) H<sup>+</sup> adsorption; b) H<sup>+</sup> reduction by delivered photoelectrons; c, d) H<sub>2</sub> formation and desorption.

For better understanding the enhanced interfacial H<sub>2</sub>-evolution process, a more detailed mechanism showing the hydrogen-evolution route has been proposed (Fig. S7). First, the electron-poor Se<sup>(2-δ)</sup> active sites on WSe<sub>2+x</sub> cocatalyst can effectively adsorb positive H<sup>+</sup> ions from the reaction system via Se<sup>(2-δ)</sup>-H<sup>+</sup> interaction (Fig. S7a). Subsequently, the adsorbed H<sup>+</sup> ions on the WSe<sub>2+x</sub> surface can be rapidly reduced by the delivered photoelectrons of WSe<sub>2+x</sub> to form the adsorbed atomic hydrogen (Se<sup>(2-δ)</sup>-H<sub>ads</sub>) on the Se<sup>(2-δ)</sup> sites (Fig. S7b). After that, the adsorbed atomic hydrogen can effectively bond with adjacent atomic hydrogen (Fig. S7c) and finally desorb to produce H<sub>2</sub> gas (Fig. S7d). Therefore, the above electron-poor Se<sup>(2-δ)</sup>-mediated hydrogen-generation cycle can greatly enhance the photocatalytic hydrogen-production performance of WSe<sub>2+x</sub>/TiO<sub>2</sub>.

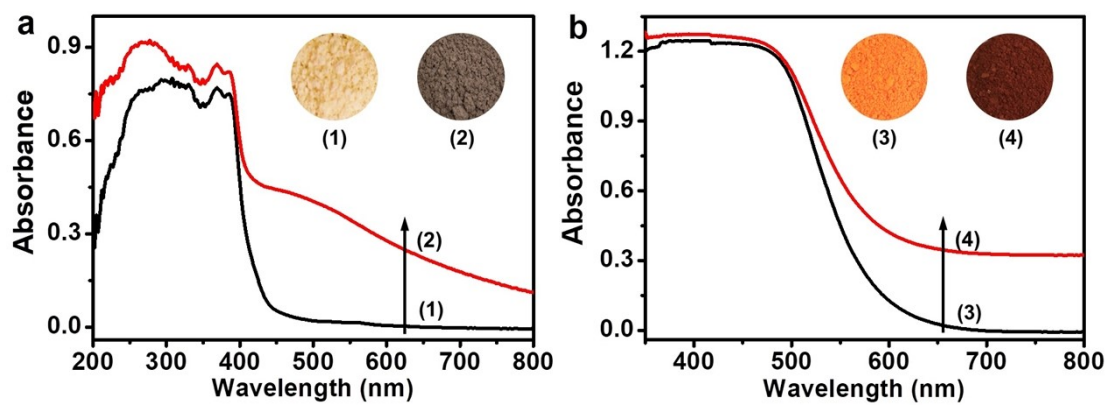

**Fig. S8** (a, b) UV-vis absorption spectra of (1) g-C<sub>3</sub>N<sub>4</sub>, (2) Se-enriched WSe<sub>2+x</sub>/g-C<sub>3</sub>N<sub>4</sub>(3wt%), (3) CdS, and (4) Se-enriched WSe<sub>2+x</sub>/CdS(3wt%).

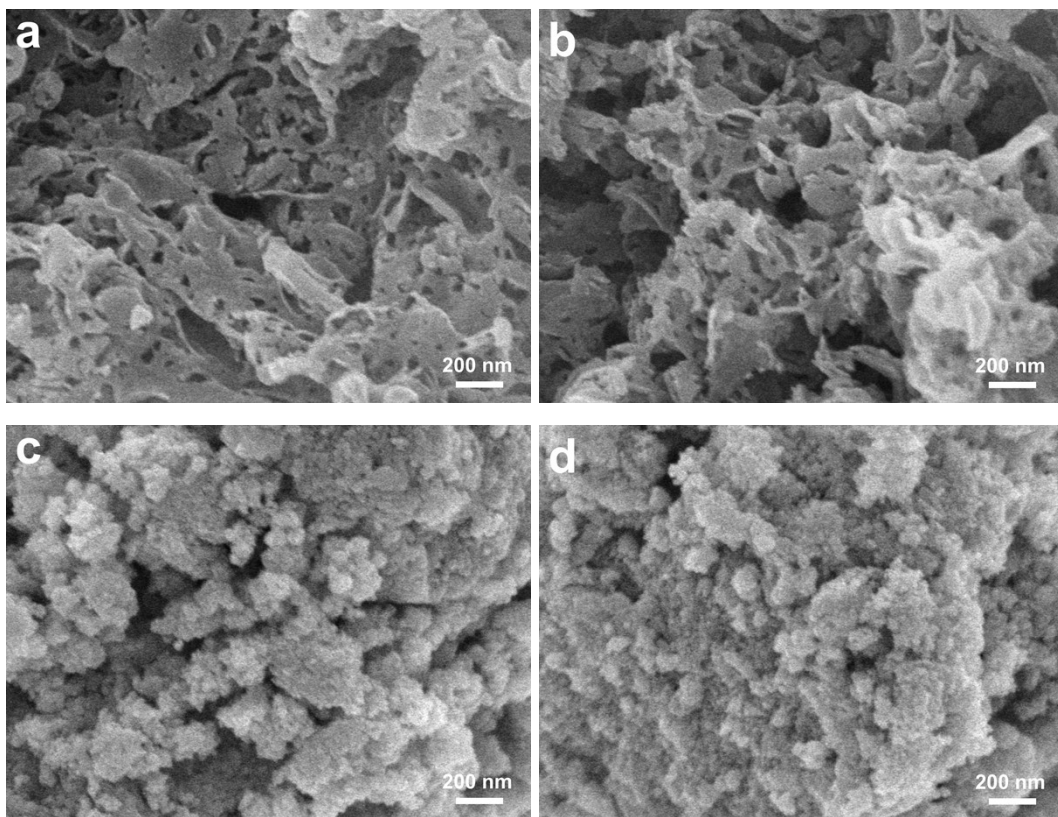

**Fig. S9** (a–d) FESEM images of (a)  $g\text{-C}_3\text{N}_4$ , (b) Se-enriched  $\text{WSe}_{2+x}/g\text{-C}_3\text{N}_4(3\text{wt}\%)$ , (c) CdS, and (d) Se-enriched  $\text{WSe}_{2+x}/\text{CdS}(3\text{wt}\%)$ .

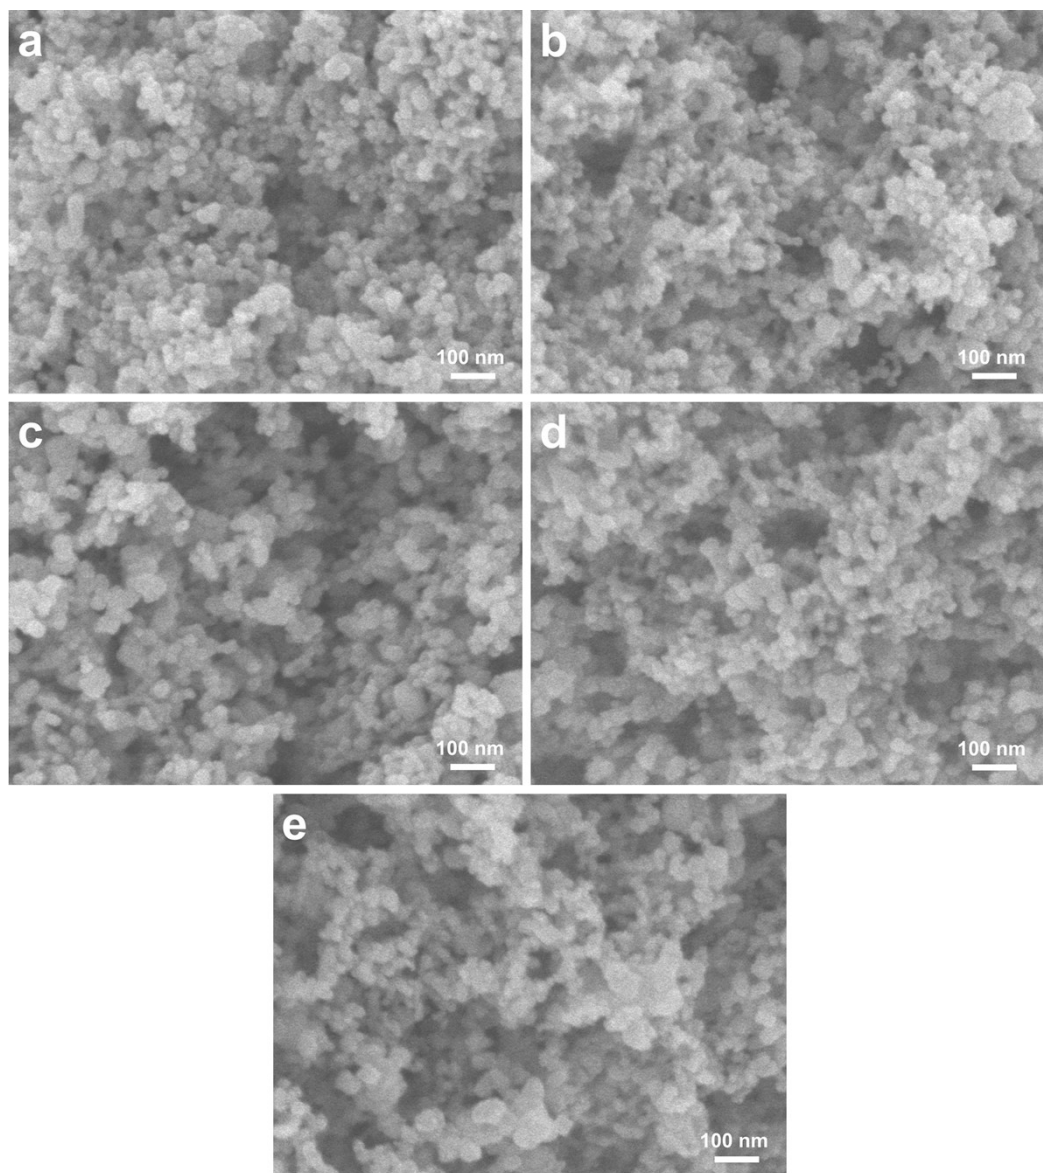

**Fig. S10** (a–e) FESEM images of selenium-enriched (a) a-CuSe<sub>1+x</sub>/TiO<sub>2</sub>(3wt%), (b) a-FeSe<sub>1+x</sub>/TiO<sub>2</sub>(3wt%), (c) a-CoSe<sub>1+x</sub>/TiO<sub>2</sub>(3wt%), (d) a-NiSe<sub>1+x</sub>/TiO<sub>2</sub>(3wt%), and (e) a-MoSe<sub>2+x</sub>/TiO<sub>2</sub>(3wt%).

## References

- 1 W. Wang, S. Zhu, Y. Cao, Y. Tao, X. Li, D. Pan, D. L. Phillips, D. Zhang, M. Chen, G. Li and H. Li, *Adv. Funct. Mater.*, 2019, **29**, 1901958.
- 2 R. Song, W. Zhou, B. Luo and D. Jing, *Appl. Surf. Sci.*, 2017, **416**, 957-964.
- 3 J. Liu, P. Wang, J. Fan and H. Yu, *J. Energy Chem.*, 2020, **51**, 253-261.
- 4 T. Sun, J. Fan, E. Liu, L. Liu, Y. Wang, H. Dai, Y. Yang, W. Hou, X. Hu and Z. Jiang, *Powder Technol.*, 2012, **228**, 210-218.
- 5 F. Chen, W. Luo, Y. Mo, H. Yu and B. Cheng, *Appl. Surf. Sci.*, 2018, **430**, 448-456.
- 6 Y. Xue, S. Min, J. Meng, X. Liu, Y. Lei, L. Tian and F. Wang, *Int. J. Hydrogen Energy*, 2019, **44**, 8133-8143.
- 7 J. Xu, W. Zhong, H. Yu, X. Hong, J. Fan and J. Yu, *J. Mater. Chem. C*, 2020, **8**, 15816-15822.
- 8 H. She, X. Ma, K. Chen, H. Liu, J. Huang, L. Wang and Q. Wang, *J. Alloys Compd.*, 2020, **821**, 153239.
- 9 F. Xu, L. Zhang, B. Cheng and J. Yu, *ACS Sustainable Chem. Eng.*, 2018, **6**, 12291-12298.
- 10 P. D. Tran, L. Xi, S. K. Batabyal, L. H. Wong, J. Barber and J. S. Chye Loo, *Phys. Chem. Chem. Phys.*, 2012, **14**, 11596-11599.
